# Supplementary material for: Allotopic expression of mitochondrial-encoded genes in mammals: achieved goal, undemonstrated mechanism or impossible task?
Source: PubMed Central journal article supplement — Nucleic Acids Res. 2010 Sep 7;39(1):225–34. doi: 10.1093/nar/gkq769 (PMC3017613; doi:10.1093/nar/gkq769), 2010-09-07
Supplement: supp_gkq769_nar-00098-w-2010-File006.pdf [file supp_gkq769_nar-00098-w-2010-File006.pdf]

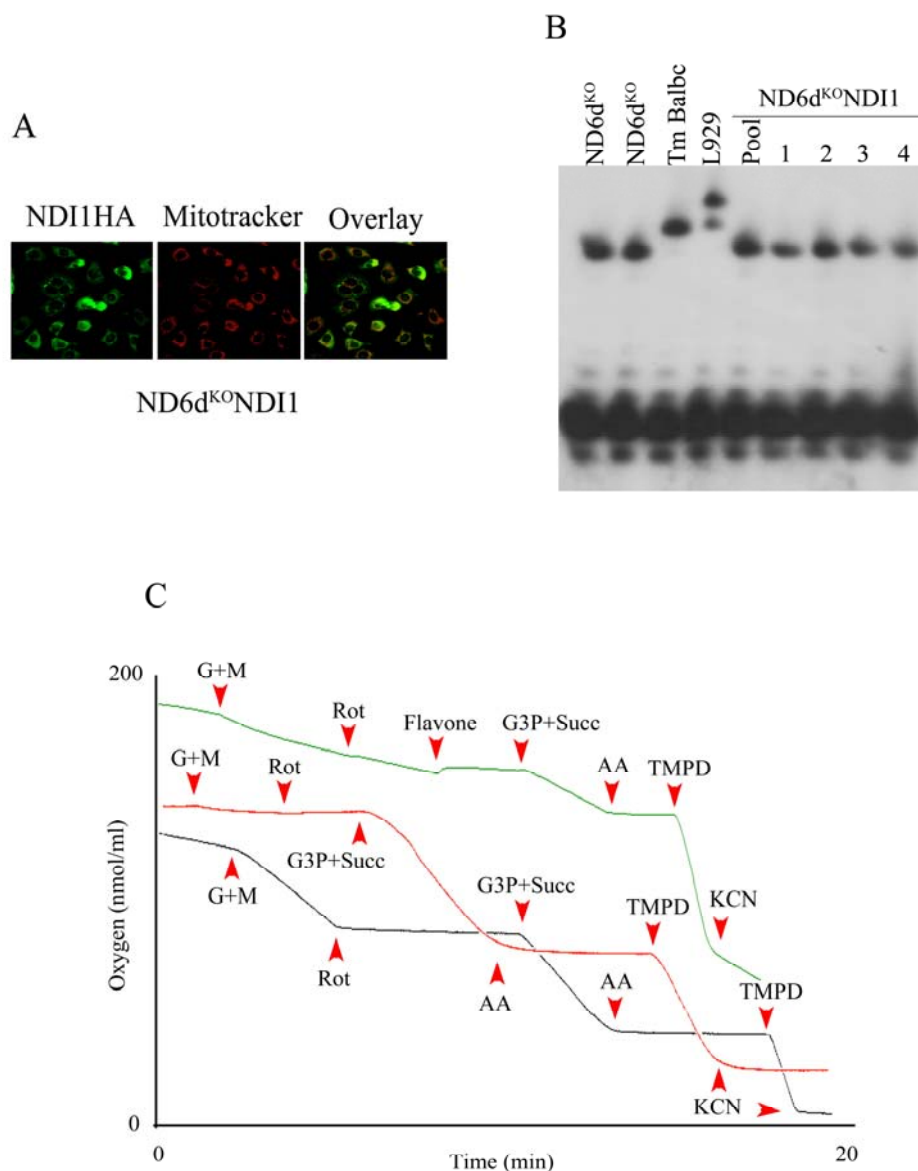

**Figure S1** Expression of *NDI1* protein in *ND6d<sup>KO</sup>* cells. (A) Immunodetection of *NDI1* (*NDI1HA*) using anti-HA antibody. The yeast enzyme was expressed and the protein apparently co-localized with mitochondria, revealed by staining with Mitotracker<sup>®</sup> Red (Invitrogen). (B) Allele-specific primer extension termination. The pool of galactose-resistant cells and all individual clones maintained homoplasmy for the deletion of cytosine 13887 in the *mt-Nd6* gene. (C) Polarographic measurements for wild-type cells (gray), complex I mutant (*ND6d<sup>KO</sup>*) cells (red) and *NDI1* transformed *ND6d<sup>KO</sup>* cells (green). Note the differences between the traces for wild-type, *ND6d<sup>KO</sup>* and *ND6d<sup>KO</sup>NDI1* cells. In the *ND6d<sup>KO</sup>* cells NADH-linked substrate (glutamate+malate) oxygen consumption is undetectable, while the activities of CII+CIII (succinate+glycerol-3-P-linked oxygen consumption) and CIV (TMPD-linked oxygen consumption) are comparable to those of wild-type cells. Note that in *NDI1* transformed cells glutamate+malate driven respiration was insensitive to the complex I inhibitor rotenone, but sensitive to flavone, an inhibitor of *NDI1*, indicating that this respiration was due to the function of the yeast enzyme. G+M: glutamate+malate; Rot: rotenone; G3P+Succ: glycerol-3-P+succinate; AA: antimycin A; TMPD: N,N,N',N'-tetramethyl-p-phenyl-enediamine; KCN: potassium cyanide

1 ACCATGTCTGTCCTGACGCCACTGCTGCTGAGGAGCCTGACCGGCAGCGCCCGGGCGGCTC  
61 ATGGTGCCCGGGCTCAGGTCATGAACAACACTACATCTTCGTGCTGAGCAGCCTGTTCCCTG  
121 GTGGGCTGTCTGGGCCTGGCCCTGAAGCCAAGCCCAATCTACGGCGGCCTGGGCCTGATC  
181 GTGAGCGGCTTCGTGGGCTGTCTGATGGTGCTGGGCTTCGGCGGCAGCTTCCTGGGCCTG  
241 ATGGTGTTCCTGATCTACCTGGGCGGCATGCTGGTGGTGTTCGGCTACACAACAGCCATG  
301 GCCACAGAGGAGTACCCAGAGACATGGGGCAGCAACTGGCTGATCCTGGGCTTCCTGGTG  
361 CTGGGCGTGATCATGGAGGTGTTCCCTGATCTGTGTGCTGAACTACTACGATGAGGTGGGC  
421 GTGATCAACCTGGATGGCCTGGGCGATTGGCTGATGTACGAGGTGGATGATGTGGGCGTG  
481 ATGCTGGAGGGCGGCATCGGCGTGGCCGCCATGTACAGCTGTGCCACATGGATGATGGTG  
541 GTGGCCGGCTGGAGCCTGTTCCGCGGCATCTTCATCATCATCGAGATCACAAGGGATTAA

**Figure S2** *Allotopic expression gene*. Sequence of the nuclear encoded Nd6 gene, with the MTS of C8 (in blue), adapted to the mouse codon usage. The partial Kozac sequence is shown in red.
